# Supplementary material for: Far-UVC efficiently inactivates an airborne pathogen in a room-sized chamber
Source: Research Square preprint supplement (doi:10.21203/rs.3.rs-908156/v1), 2021-09-15
Supplement: Supplementary file 1 [file c0c76dbdcb6cc2c08912d93a.xlsx]

## Sheet: Sheet1
	cfu m-3
	High		Medium		Low
Time from lamp switch on (mins)	1 Lamp	5 Lamp	1 Lamp	5 Lamp	1 Lamp	5 Lamp
-45	4160.71	2035.71		3660.71
-40	3321.43	2937.5		3830.36
-35	3357.14	2250		3607.14	8401.79	7864.29
-30	2383.93	2142.86		4196.43	11383.9	10297.6
-25	2178.57	2339.29		3910.71	7803.57	12696.4
-20	3830.36	2375	3321.43	3580.36	7840.14	8616.07
-15	4200.68	1910.71	3848.21	3892.86	8419.64	14125
-10	4366.07	2098.21	3758.93	4419.64	7348.21	13705.4
-5	3705.36	2901.79	4437.5	3946.43	7232.14	9241.07
0	3401.79	2303.57	3339.29	4223.21	7652	8928.57
5	535.714	26.7857	3196.43	2794.64	7794.64	8785.71
10	276.786	17.8571	2714.29	767.857	7732.14	7303.57
15	285.714	8.92857	2285.71	339.286	7919.64	7714.29
20	178.571	9	1741.07	339.286	8214.29	7517.86
25	214.286	0	1526.79	250	7250	7723.21
30	187.5	0	1330.36	312.5	7776.79	6973.21
35	178.571	0	1285.71	339.286	7205.36	7821.43
40	226.19	8.92857	1267.86	348.214	7000	8017.86
45	258.929	0	1151.79	294.643	7160.71	7508.93
50	258.929	0	1098.21	339.286	6848.21	7678.57
